# Supplementary material
Source: HighWire-hosted journal article supplement (https://erj.ersjournals.com/content/56/2/1902279)
Supplement: inline-supplementary-material-1 [file inline-supplementary-material-1.pdf]

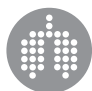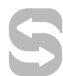

SHAREABLE PDF

# Survival and course of lung function in the presence or absence of antifibrotic treatment in patients with idiopathic pulmonary fibrosis: long-term results of the INSIGHTS-IPF registry

Jürgen Behr<sup>1,2,3,4</sup>, Antje Prasse<sup>5,6,7</sup>, Hubert Wirtz<sup>7</sup>, Dirk Koschel<sup>8</sup>, David Pittrow<sup>9,10</sup>, Matthias Held<sup>11</sup>, Jens Klotsche<sup>12</sup>, Stefan Andreas<sup>13</sup>, Martin Claussen<sup>4,14</sup>, Christian Grohé<sup>15</sup>, Henrike Wilkens<sup>16</sup>, Lars Hagmeyer<sup>17</sup>, Dirk Skowasch<sup>18</sup>, Joachim F. Meyer<sup>19</sup>, Joachim Kirschner<sup>20</sup>, Sven Gläser<sup>21,22</sup>, Nicolas Kahn<sup>23</sup>, Tobias Welte<sup>4,5</sup>, Claus Neurohr<sup>24</sup>, Martin Schwaiblmair<sup>25</sup>, Thomas Bahmer<sup>14,26</sup>, Tim Oqueka<sup>27</sup>, Marion Frankenberger<sup>2</sup> and Michael Kreuter<sup>4,23</sup>

**Affiliations:** <sup>1</sup>Medizinische Klinik und Poliklinik V, LMU Klinikum, University of Munich, Munich, Germany. <sup>2</sup>Comprehensive Pneumology Center (CPC), Lungenforschungsambulanz, LMU Klinikum und Helmholtz Zentrum, Munich, Germany. <sup>3</sup>Asklepios Fachkliniken, München-Gauting, Germany. <sup>4</sup>German Center for Lung Research (DZL), Germany. <sup>5</sup>Klinik für Pneumologie, Medizinische Hochschule Hannover, Hannover, Germany. <sup>6</sup>Fraunhofer Institute ITEM, Hannover, Germany. <sup>7</sup>Abteilung für Pneumologie, Department Innere Medizin, Neurologie und Dermatologie, Universitätsklinikum Leipzig AöR, Leipzig, Germany. <sup>8</sup>Zentrum für Pneumologie, Fachkrankenhaus Coswig, Coswig, Germany. <sup>9</sup>Institut für Klinische Pharmakologie, Medizinische Fakultät, Technische Universität Dresden, Dresden, Germany. <sup>10</sup>GWT-TUD GmbH, Pharmacoepidemiology, Dresden, Germany. <sup>11</sup>Department of Internal Medicine, Respiratory Medicine and Ventilatory Support, Medical Mission Hospital, Central Clinic, Würzburg, Germany. <sup>12</sup>Epidemiologie, Deutsches Rheuma-Forschungszentrum, Berlin, Germany. <sup>13</sup>Lungenfachklinik Immenhausen und Universitätsmedizin Göttingen, Kardiologie und Pneumologie, Göttingen, Germany. <sup>14</sup>LungenClinic Grosshansdorf, Großhansdorf, Germany. <sup>15</sup>Klinik für Pneumologie – ELK, Berlin Buch, Berlin, Germany. <sup>16</sup>Klinik für Innere Medizin V, Pneumologie, Universitätsklinikum, Universitätsklinik des Saarlandes, Homburg, Germany. <sup>17</sup>Krankenhaus Bethanien, Klinik für Pneumologie und Allergologie, Zentrum für Schlaf- und Beatmungsmedizin; Institut für Pneumologie, Universität zu Köln, Solingen, Germany. <sup>18</sup>Medizinische Klinik und Poliklinik II, Universitätsklinikum, Bonn, Germany. <sup>19</sup>Lungenzentrum München, LZM Bogenhausen-Harlaching, Städtisches Klinikum München GmbH, Munich, Germany. <sup>20</sup>Center for Internal Medical Studies CIMS, Bamberg, Germany. <sup>21</sup>Klinik und Poliklinik für Innere Medizin B, Forschungsbereich Pneumologie und Pneumologische Epidemiologie, Universitätsmedizin Greifswald, Greifswald, Germany. <sup>22</sup>Klinik für Innere Medizin – Pneumologie und Infektiologie, Vivantes Klinikum Neukölln und Spandau, Berlin, Germany. <sup>23</sup>Center for Interstitial and Rare Lung Diseases, Pneumology, Thoraxklinik, University of Heidelberg, Heidelberg, Germany. <sup>24</sup>Abteilung für Pneumologie und Beatmungsmedizin, Klinik Schillerhöhe, Gerlingen, Germany. <sup>25</sup>Medizinische Klinik, Universitätsklinikum, Augsburg, Germany. <sup>26</sup>Abteilung für Innere Medizin I, Universitätsklinikum Schleswig-Holstein, Campus Kiel, Kiel, Germany. <sup>27</sup>II Medizinische Klinik und Poliklinik, Universitätsklinikum, Hamburg-Eppendorf, Germany.

**Correspondence:** Jürgen Behr, Medizinische Klinik und Poliklinik V, LMU Klinikum, University of Munich, Marchionistraße 15, 81377, München, Germany, E-mail: juergen.behr@med.uni-muenchen.de

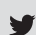

@ERSpublications

**Survival was significantly higher in antifibrotic-treated (AT) IPF patients, but the course of lung function parameters was similar in AT and non-AT patients, suggesting that functional stability alone may not safeguard against premature mortality in IPF** <https://bit.ly/2RDsrVY>

**Cite this article as:** Behr J, Prasse A, Wirtz H, *et al.* Survival and course of lung function in the presence or absence of antifibrotic treatment in patients with idiopathic pulmonary fibrosis: long-term results of the INSIGHTS-IPF registry. *Eur Respir J* 2020; 56: 1902279 [<https://doi.org/10.1183/13993003.02279-2019>].

This single-page version can be shared freely online.

#### ABSTRACT

**Objective:** There is a paucity of observational data on antifibrotic therapy for idiopathic pulmonary fibrosis (IPF). We aimed to assess the course of disease of IPF patients with and without antifibrotic therapy under real-life conditions.

**Methods:** We analysed data from a non-interventional, prospective cohort study of consecutively enrolled IPF patients from 20 interstitial lung disease expert centres in Germany. Data quality was ensured by automated plausibility checks, on-site monitoring, and source data verification. Propensity scores were applied to account for known differences in baseline characteristics between patients with and without antifibrotic therapy.

**Results:** Among the 588 patients suitable for analysis, the mean $\pm$ SD age was 69.8 $\pm$ 9.1 years, and 81.0% were male. The mean $\pm$ SD duration of disease since diagnosis was 1.8 $\pm$ 3.4 years. The mean $\pm$ SD value at baseline for forced vital capacity (FVC) and diffusion capacity ( $D_{LCO}$ ) were 68.6 $\pm$ 18.8% predicted and 37.8 $\pm$ 18.5% predicted, respectively. During a mean $\pm$ SD follow-up of 1.2 $\pm$ 0.7 years, 194 (33.0%) patients died. The 1-year and 2-year survival rates were 87% *versus* 46% and 62% *versus* 21%, respectively, for patients with *versus* without antifibrotic therapy. The risk of death was 37% lower in patients with antifibrotic therapy (hazard ratio 0.63, 95% CI 0.45; 0.87;  $p=0.005$ ). The results were robust (and remained statistically significant) on multivariable analysis. Overall decline of FVC and  $D_{LCO}$  was slow and did not differ significantly between patients with or without antifibrotic therapy.

**Conclusions:** Survival was significantly higher in IPF patients with antifibrotic therapy, but the course of lung function parameters was similar in patients with and without antifibrotic therapy. This suggests that in clinical practice, premature mortality of IPF patients eventually occurs despite stable measurements for FVC and  $D_{LCO}$ .
